# Supplementary material for: The Neurochemical and Microstructural Changes in the Brain of Systemic Lupus Erythematosus Patients: A Multimodal MRI Study
Source: PubMed Central journal article supplement (PMC4725825; doi:10.1038/srep19026), 2016-01-13
Supplement: srep19026-s1.pdf [file srep19026-s1.pdf]

## **Supplementary Information**

### **The Neurochemical and Microstructural Changes in the Brain of Systemic Lupus Erythematosus Patients: A Multimodal MRI Study**

Zhiyan Zhang, Yukai Wang, Zhiwei Shen, Zhongxian Yang, Li Li, Dongxiao Cheng, Geng Yan,  
Xiaofang Cheng, Yuanyu Shen, Xiangyong Tang, Wei Hu, Renhua Wu

**Supplementary Table S1. Absolute concentrations of metabolites (in mmol/L) in bilateral LN and PWM**

| Metabolites | NPSLE (N=22)  |               | non-NPSLE (N=21) |               | HC (N = 20)   |               | <i>F</i> | <i>p</i>     |
|-------------|---------------|---------------|------------------|---------------|---------------|---------------|----------|--------------|
|             | Mean ±SD      | Adjusted Mean | Mean ±SD         | Adjusted Mean | Mean ±SD      | Adjusted Mean |          |              |
| <b>RLN</b>  |               |               |                  |               |               |               |          |              |
| NAA         | 8.043 ±1.372  | 8.012         | 7.975 ±1.373     | 7.971         | 7.976 ±1.336  | 8.013         | 0.006    | 0.994        |
| Cho&        | 1.751 ±0.292  | 1.747         | 1.930 ±0.400     | 1.930         | 1.630 ±0.425  | 1.635         | 2.983    | 0.059        |
| MI          | 5.628 ±2.333  | 5.778         | 5.195 ±1.254     | 5.202         | 5.026 ±2.297  | 4.823         | 0.763    | 0.472        |
| Glx         | 13.562 ±3.170 | 13.575        | 14.023 ±2.404    | 14.051        | 13.705 ±3.725 | 13.647        | 0.139    | 0.870        |
| tCr         | 6.764 ±1.152  | 6.771         | 6.994 ±1.349     | 6.994         | 6.570 ±1.416  | 6.563         | 0.503    | 0.607        |
| <b>LLN</b>  |               |               |                  |               |               |               |          |              |
| NAA#        | 8.984 ±1.462  | 8.826         | 9.373 ±1.266     | 9.359         | 10.067 ±1.070 | 10.247        | 5.108    | <b>0.009</b> |
| Cho         | 2.251 ±0.365  | 2.225         | 2.176 ±0.437     | 2.174         | 2.255 ±0.422  | 2.284         | 0.348    | 0.708        |
| MI          | 5.671 ±1.670  | 5.808         | 5.096 ±1.090     | 5.106         | 5.442 ±1.754  | 5.278         | 1.098    | 0.341        |
| Glx         | 15.824 ±7.214 | 16.325        | 15.120 ±2.923    | 15.242        | 17.295 ±2.777 | 16.749        | 0.536    | 0.588        |
| tCr         | 8.240 ±1.555  | 8.206         | 8.259 ±0.960     | 8.256         | 8.599 ±1.398  | 8.638         | 0.505    | 0.606        |
| <b>RPWM</b> |               |               |                  |               |               |               |          |              |
| NAA         | 8.684 ±1.539  | 8.644         | 8.925 ±1.755     | 8.918         | 9.713 ±0.947  | 9.764         | 2.496    | 0.091        |
| Cho         | 1.930 ±0.430  | 1.951         | 1.861 ±0.247     | 1.863         | 2.067 ±0.328  | 2.041         | 1.252    | 0.294        |
| MI          | 6.008 ±2.187  | 6.153         | 5.312 ±1.337     | 5.323         | 5.584 ±1.041  | 5.412         | 1.456    | 0.242        |
| Glx         | 11.107 ±3.332 | 11.143        | 11.716 ±2.397    | 11.719        | 11.696 ±2.704 | 11.657        | 0.220    | 0.803        |
| tCr         | 5.532 ±1.105  | 5.527         | 5.289 ±1.200     | 5.289         | 5.570 ±0.639  | 5.575         | 0.450    | 0.640        |
| <b>LPWM</b> |               |               |                  |               |               |               |          |              |
| NAA         | 8.847 ±1.867  | 9.027         | 9.906 ±1.624     | 9.895         | 10.320 ±1.257 | 10.133        | 2.109    | 0.131        |
| Cho         | 2.031 ±0.353  | 2.023         | 1.982 ±0.409     | 1.983         | 2.164 ±0.263  | 2.172         | 1.388    | 0.258        |
| MI          | 5.810 ±1.689  | 6.065         | 6.132 ±1.301     | 6.120         | 5.787 ±1.160  | 5.517         | 0.942    | 0.396        |
| Glx         | 12.200 ±2.611 | 12.300        | 11.031 ±2.354    | 11.032        | 11.858 ±2.550 | 11.748        | 1.317    | 0.276        |
| tCr         | 5.973 ±1.076  | 6.082         | 6.268 ±1.049     | 6.260         | 5.963 ±0.671  | 5.850         | 0.831    | 0.441        |

& Statistically significant for non-NPSLE vs HC ( $p < 0.05$ ); # Statistically significant for NPSLE vs HC ( $p < 0.01$ ) and non-NPSLE vs HC ( $p < 0.05$ ); Abbreviations: NPSLE = neuropsychiatric systemic lupus erythematosus; HC = healthy control; LN = lentiform nucleus; PWM = posterior paratrigonal white matter; NAA = N-acetylaspartate; tCr = total creatine; Cho = choline; MI = myoinositol; Glx = glutamine + glutamate
